# Supplementary material for: Rapid simultaneous analysis of ten biogenic amines in aquatic products through ultra-high performance supercritical fluid chromatography combined with mass spectrometry
Source: Research Square preprint supplement (doi:10.21203/rs.3.rs-1573040/v1), 2022-05-02

**Graphical abstract**

An accurate, ultra-high performance supercritical fluid chromatography combined with mass spectrometry method for the simultaneous determination of biogenic amines (BAs) was developed, this approach is environmentally friendly and successfully achieved in 5 min.


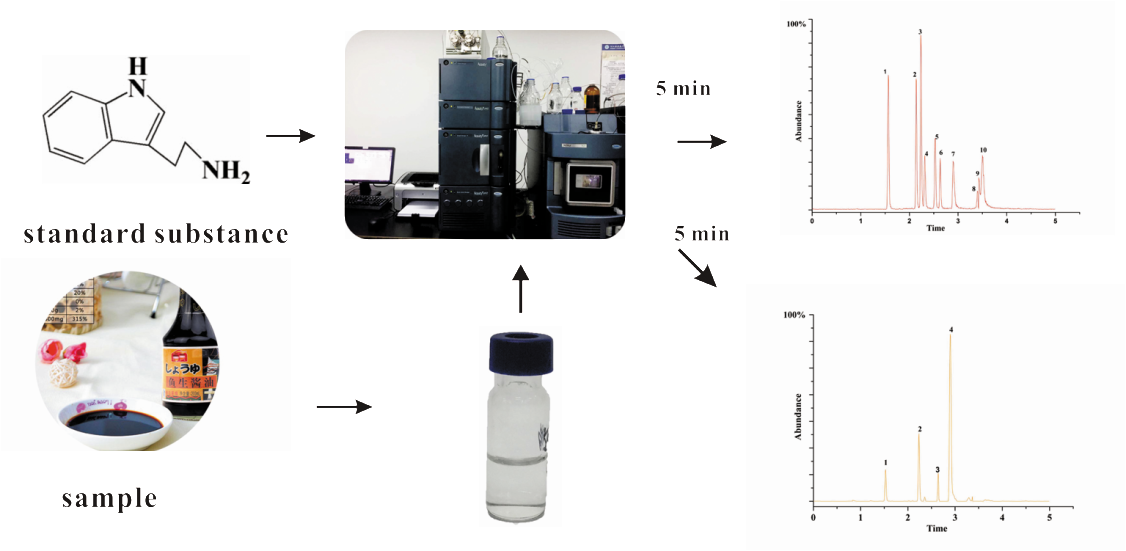

Supplement: Supplementary file 1 [file 5ef82227a0f1dc09c5ade968.docx]
